1 **Article title:** Depression and anxiety during the COVID-19 pandemic in Saudi Arabia: a cross-  
2 sectional study

3 **Short-running title:** Depression and anxiety in Saudi Arabia

4 **Authors' information:**

5 Hamad S. Alyami<sup>1\*</sup>, Abdallah Y Naser<sup>2</sup>, Eman Zmaily Dahmash<sup>2</sup>, Mohammed H. Alyami<sup>1</sup>,  
6 Musfer S Alyami<sup>3</sup>

7 **Authors' affiliation:**

8 <sup>1</sup> Department of Pharmaceutics, College of Pharmacy, Najran University, Najran, Saudi Arabia.

9 <sup>2</sup> Department of Applied Pharmaceutical Sciences and Clinical Pharmacy, Faculty of Pharmacy,  
10 Isra University, Amman, Jordan.

11 <sup>3</sup> College of Medicine, King Khalid University, Abha, Saudi Arabia

12 **Corresponding author:**

13 Dr. Hamad S. Alyami, Assistant Professor in Drug Delivery, Department of Pharmaceutics,  
14 College of Pharmacy, Najran University, Najran, Saudi Arabia, [hsalmukalas@nu.edu.sa](mailto:hsalmukalas@nu.edu.sa); +966  
15 (5)00095255.

16 **Declaration of Competing Interest**

17 The authors declare no conflict of interest.

18 **Acknowledgment**

19 This paper appears on a pre-print server (medrxiv):

20 <https://www.medrxiv.org/content/10.1101/2020.05.09.20096677v1>

21

22

23

24

25 **Abstract**

26 **Aims:** The emergence of the COVID-19 global pandemic, with a high transmission and mortality  
27 rate, has created an extraordinary crisis worldwide. Such an unusual situation may have an  
28 undesirable impact on the mental health of individuals which, in turn, may influence their  
29 outcomes. This study aimed to explore the influence of the COVID-19 pandemic on the  
30 psychological disposition of residents of the Kingdom of Saudi Arabia.

31 **Methods:** A cross-sectional study using an online survey was conducted in Saudi Arabia  
32 between 27 March and 27 April 2020. The Patient Health Questionnaire (PHQ-9) and  
33 Generalised Anxiety Disorder-7 (GAD-7) were used to assess depression and anxiety. Logistic  
34 regression analysis was used to identify predictors of these.

35 **Results:** A total of 2,081 individuals participated in the study. The prevalence of depression and  
36 anxiety among the study participants was 9.4% and 7.3%, respectively. Non-Saudi residents,  
37 individuals aged 50 years and above, divorced people, retired people, university students, and  
38 those with an income between 2,000 and 10,000 SR were at higher risk of developing  
39 depression. Saudi individuals, married people, the unemployed, and those with a high income (>  
40 10,000 RS) were at higher risk of developing anxiety.

41 **Conclusion:** We found that there is a wide range of Saudi residents who are at higher risk of  
42 developing mental illness during the current COVID-19 pandemic. Policymakers and mental  
43 healthcare providers are advised to provide continuous monitoring of the psychological  
44 consequences during this pandemic and provide the required health support.

45 **Keywords:** Anxiety; COVID-19; Depression; Pandemic; Saudi Arabia

46

47

48 **What is already known about this subject?**

49 - The emergence of the COVID-19 global pandemic, with a high transmission and mortality rate,  
50 has created an extraordinary crisis worldwide.

51 - The COVID-19 pandemic might have an undesirable impact on the mental health of  
52 individuals.

53 **What does this article add?**

54 - Depression and anxiety are common among the Saudi population.

55 - A considerable proportion of the Saudi population is concerned about contracting COVID-19  
56 or transmitting it to family members.

57 - Unemployed individuals and university students are at higher risk of depression and anxiety.

58

59

60

61

62

63

64

65

66

67

68

69

70 **1. Introduction**

71 COVID-19, which stands for coronavirus disease 2019, is a cluster of three acute respiratory  
72 illnesses that first occurred in Wuhan, Hubei Province, China in December 2019 <sup>1</sup>. In early  
73 March 2020, the first case of COVID-19 was confirmed in the Kingdom of Saudi Arabia, and  
74 since then, it has caused 2,017 deaths out of the 217,108 patients who were infected with this  
75 disease until the 7<sup>th</sup> of July 2020 <sup>2-4</sup>. The causative agent for COVID-19 has been identified as a  
76 new RNA virus from the beta-coronavirus family; its transmission rate is considered high  
77 because it is transmitted in different ways, such as respiratory droplets and close contact. The  
78 World Health Organization (WHO) has categorised COVID-19 as a pandemic infection since the  
79 respiratory illness it causes is highly contagious <sup>5</sup> because of the novelty of the virus, its rapid  
80 spread, and the lack of therapeutic and preventative strategies <sup>6</sup>.

81 The spread of COVID-19 presents serious risks globally and in Saudi Arabia, which  
82 has reported 393,377 cases and 6,704 deaths as of 06 April 2021<sup>7</sup>. Saudi Arabia has exceptional  
83 circumstances as it is a hub for millions of foreign workers and pilgrims from across the globe.  
84 In response to the pandemic and to combat the spread of the disease, the government took swift  
85 action and closed the two holy mosques, suspended travel to the country, closed most businesses  
86 and limited individuals' movement. Further, the government created a national narrative to  
87 encourage citizens to adhere to the emergency measures established in response to the pandemic  
88 <sup>6</sup>. The Kingdom of Saudi Arabia took the deadly coronavirus outbreak seriously, even before the  
89 Ministry of Health announced the first confirmed COVID-19 case; for example, it announced the  
90 temporary suspension of entry to Makkah and Madinah in February 2020 <sup>8</sup>. After the first  
91 confirmed case, the government announced a series of extreme measures to control the spread of  
92 the virus, beginning on 8 March with a ban on all transport in and out of the Qatif Governorate.

93 Then, on 6 April, they announced a 24-hour curfew to be implemented in the major cities, with  
94 movement restricted to essential travel between 6 a.m. and 3 p.m.<sup>9</sup> The extremely proactive  
95 measures taken to prevent the spread of the virus could have provoked other health outcomes  
96 usually neglected in crisis and pandemic management<sup>10-15</sup>. Recent studies have shown that the  
97 rapid global growth in the number of COVID-19 cases and deaths, the collapse of the healthcare  
98 system in many countries, and the subsequent lack of effective medical treatment have had the  
99 same effect<sup>16-18</sup>. COVID-19 is having a severe impact on the physical and mental health of the  
100 public<sup>16,18-21</sup>; therefore, we aimed to assess the mental health burden placed on citizens and  
101 residents inside the Kingdom of Saudi Arabia at this time, as well as to identify potential  
102 populations who may need psychological intervention.

## 103 **2. Methods**

### 104 *2.1. Study design and study population*

105 A cross-sectional study using an online survey was conducted in Saudi Arabia between 27 March  
106 and 27 April 2020 to explore depression and anxiety among the general population during the  
107 COVID-19 pandemic.

### 108 *2.2. Sampling strategy*

109 A convenience sample of eligible participants drawn from the general population was invited  
110 through social media (Facebook and WhatsApp) to participate in the study. All the participants  
111 participated voluntarily in the study and were, thus, considered exempt from written informed  
112 consent. The study aims and objectives were clearly explained at the beginning of the survey.

113 The inclusion criteria were: a) participants aged 18 years and above and living currently in Saudi  
114 Arabia, and b) participants who had no apparent cognitive deficiency. Participants were excluded

115 if they were: a) below 18 years of age, b) unable to understand the Arabic language, and c)  
116 unable to participate due to physical or emotional distress. The inclusion and exclusion criteria  
117 were clearly stated in the invitation letter accompanying the questionnaire. Participants were  
118 invited to participate if they were eligible.

### 119 *2.3. Depression and anxiety assessment scales*

120 Previously validated assessment scales, the Patient Health Questionnaire (PHQ)-9, and  
121 Generalised Anxiety Disorder seven-item (GAD-7), were used to assess depression and anxiety  
122 among the study participants. These screening instruments have been frequently used and have  
123 been validated as brief screening tools among various populations for depression and anxiety <sup>22-</sup>  
124 <sup>26</sup>. The following information was also collected: the participants' demographics (age, gender,  
125 income, education level, employment status, and marital status). Furthermore, participants were  
126 asked whether they were worried about being infected with COVID-19 or transmitting it to  
127 family members (yes/no question) and whether they had any underlying chronic conditions  
128 (yes/no question).

129 The PHQ-9 scale is a nine-item instrument given to participants to screen for the presence and  
130 severity of depression <sup>27,28</sup>. The GAD-7 instrument was used to screen for anxiety <sup>29</sup>. The PHQ-9  
131 and the GAD-7 instruments asked the participants about the degree of applicability of a range of  
132 items (questions), using a four-point Likert scale. Participants' responses ranged from 0 to 3,  
133 where zero meant "Not at all" and three meant "Nearly every day". The PHQ-9 instrument  
134 includes nine items. Items are scored from 0 to 3, generating a total score ranging from 0 to 27.  
135 A total score of 0–4 indicates minimal depression, 5–9 mild depression, 10–14 moderate  
136 depression, 15–19 moderately severe depression, and 20–27 severe depression <sup>30</sup>. The GAD-7  
137 instrument includes seven items. Items are scored from 0 to 3, generating a total score ranging

138 from 0 to 21. A total score of 5–9 indicates mild anxiety, 10–14 moderate anxiety, and 15–21  
139 severe anxiety<sup>31</sup>.

#### 140 *2.4. An estimate of prevalence and classification of depression and anxiety*

141 Prevalence rates of depression and anxiety were determined using a cut-off point, as  
142 recommended by the authors of the PHQ-9 and GAD-7 scales. In this study, depression was  
143 defined as a total score of ( $\geq 15$ ) in the PHQ-9 instrument, indicating a case with moderately  
144 severe or severe depression. Anxiety was defined using the GAD-7 instrument with a total score  
145 of ( $\geq 15$ ), indicating a case of severe anxiety. The higher the score, the more severe the case  
146 identified by either scale.

147 The prevalence rate of depression was estimated by dividing the number of participants who  
148 exceeded the borderline score ( $\geq 15$ ) by the total number of participants in the same population.

149 The prevalence rate of anxiety was calculated using the same procedure.

#### 150 *2.5. Sample size*

151 The target sample size was estimated based on WHO recommendations for the minimal sample  
152 size needed for a prevalence study<sup>32</sup>. Using a confidence interval of 95%, a standard deviation of  
153 0.5, a margin of error of 5%, the required sample size was 385 participants.

#### 154 *2.6. Statistical analysis*

155 Descriptive statistics were used to describe the participants' demographic characteristics.  
156 Continuous data were reported as mean  $\pm$  SD for normally distributed variables and median  
157 (interquartile range (IQR)) for non-normally distributed variables. Categorical data were reported  
158 as percentages (frequencies). The Mann-Whitney U test/Kruskal-Wallis test was used to compare  
159 the median scores between different demographic groups. Logistic regression was used to

160 estimate the odds ratios (ORs) with 95% confidence intervals (CIs) for anxiety or depression.  
161 Logistic regression models were carried out using anxiety ( $\geq 15$ ) or depression scores ( $\geq 15$ )  
162 above the cut-off points highlighted above. A two-sided  $p < 0.05$  was considered to be statistically  
163 significant. The statistical analyses were carried out using SPSS (version 25).

### 164 *2.7. Ethical considerations*

165 Ethical approval was obtained from the School of Life and Health Sciences at Najran University,  
166 Najran, Saudi Arabia (27/03/2020ET). As participation in the study was voluntary and the study  
167 was on the general public without any intervention, meaning that it involved no more than  
168 minimal risk, the Research Ethics Committee approved a consent waiver.

## 169 **3. Results**

### 170 *3.1. Participant characteristics*

171 A total of 2,081 individuals participated in the study. **Table 1** details their baseline  
172 characteristics. The majority were Saudi ( $n = 1,765$ , 84.8%), ( $n = 1,404$ , 67.5%) males, aged  
173 between 30 - 49 years ( $n = 1,140$ , 54.8%), married ( $n = 1,298$ , 62.4%), holding a bachelor's  
174 degree ( $n = 1,284$ , 61.7%). More than half of them were employed ( $n = 1,272$ , 61.1%). Around  
175 12.3% ( $n = 255$ ) of the participants reported that they had a history of chronic disease. The  
176 majority ( $n = 1,587$ , 76.3%) of them reported that they were concerned about contracting  
177 COVID-19 or transmitting it to family members. When they were asked whether they had  
178 identified any problems over the previous two weeks, and the extent to which these problems had  
179 prevented them from doing their work, looking after their household affairs or dealing with  
180 people, around half of them ( $n = 1,053$ , 50.6%) reported that they faced difficulties.



181 *3.2. Prevalence of mental health problems*

182 The prevalence of depression among the participants was 9.4% (n= 196). The proportions of  
183 minimal, mild, moderate, moderately severe, and severe depression were 29.6%, 40.9%, 20 %,  
184 6.2%, and 3.2%, respectively. The prevalence of anxiety among the participants was 7.3% (n=  
185 151). The proportions of mild, moderate, and severe anxiety were 73.5%, 19.3%, and 7.3%,  
186 respectively. **Table 2 and Table 3** detail the prevalence of depression and anxiety among the  
187 participants, stratified by severity and gender, respectively.

188 *3.3. Participant demographics and mental health problems*

189 **Table 4** presents the participant demographics and their median depression and anxiety scores.  
190 The depression median score significantly differed across participants with different  
191 demographical characteristics ( $p < 0.01$ ). The anxiety median score significantly differed across  
192 participants by nationality, gender, and education level ( $p < 0.05$ ).

193 Non-Saudi residents, females, elderly individuals aged 50 years and above and young individuals  
194 aged below 29 years, divorced and single people, individuals with a low education level,  
195 university students, and individuals with a low income (2000 SR and below) tended to have  
196 higher depression median scores compared to the others. Non-Saudi residents, females, and  
197 individuals with low education levels tended to have higher anxiety median scores compared to  
198 the others.

199 The logistic regression analysis identified the following groups to be at a higher risk of  
200 depression: a) unemployed individuals and b) university students. Meanwhile, the following  
201 groups were at a lower risk of depression: a) Saudi residents, b) males, c) married individuals, d)  
202 individuals who had completed a bachelor's degree, and e) individuals with a high income (5,000

203 SR and above). Furthermore, logistic regression analysis showed that the following groups were  
204 at a higher risk of anxiety: a) unemployed individuals, and b) and university students. On the  
205 other hand, the following groups were at a lower risk of anxiety: a) males, b) elderly individuals  
206 (aged 50 years and above), c) divorced individuals, d) individuals with moderate income (5,000  
207 SR to 10,000 SR). See **Table 5**.

#### 208 **4. Discussion**

209 Overall, the findings in this study demonstrated that more than 9.4% of respondents had  
210 moderate to severe depression, whereas the prevalence of moderate to severe anxiety exceeded  
211 7.3%. A previous systematic review that explored the impact of COVID-19 on mental health in  
212 the general population reported a much higher rate of symptoms of anxiety (ranged between  
213 6.3% to 50.9%) and depression (14.6% to 48.3%) in different countries such as China, Spain,  
214 Italy, Iran, the US, Turkey, Nepal and Denmark <sup>21</sup>. Some of these countries have reported  
215 comparable rates to our results. Another recent study in Vietnam reported a close rate of anxiety  
216 and depression, with respect to our estimates, with 4.9% and 7.0%, respectively<sup>19</sup>. On the other  
217 hand, a previous study in the Philippines has reported higher prevalence rates of moderate to  
218 severe depression (16.9%) and anxiety (28.8%) <sup>20</sup>. There are many reasons for the wide range of  
219 estimates across different countries. One of these could be different assessment tools used. The  
220 timing of the study is another important influencing factor as the psychological impact was  
221 expected to be much more intense at the beginning of the pandemic since little information was  
222 known about the disease. This could have provoked public fear and other psychological  
223 symptoms. During stressful conditions, as is the case with the COVID-19 pandemic, fear and  
224 anxiety about the disease can be so overwhelming that it may cause depression and anxiety  
225 among both adults and children <sup>33</sup>. The sudden shutdown of services and lockdown of people

226 makes them vulnerable, particularly when dealing with the unpredictable status of the outbreak.  
227 The fear of getting the disease and losing loved ones is another predisposing factor that may  
228 result in such a condition <sup>34</sup>. The prevalence rate of moderate to severe depression symptoms in  
229 this study seems to be considerably higher than the one reported by the Chinese study, which  
230 included 1,210 respondents, during the COVID-19 outbreak (16.5%), whereas comparable rates  
231 for anxiety were recorded (28.8%) <sup>3</sup>. Also, it has been observed that results vary according to the  
232 sample size and the assessment tool used. Another nationwide study among Chinese people  
233 during the pandemic, which included 52,730 participants, revealed a psychological distress  
234 prevalence rate of 35% among all respondents. Distress symptoms, according to the employed  
235 assessment tool, included depression and anxiety <sup>35</sup>.

236 This study also revealed that non-Saudi residents had significantly higher prevalence rates of  
237 depression and anxiety symptoms ( $p < 0.001$ ) than Saudi individuals. Such results aligned with  
238 the percentage of infected cases among the two groups, where the data showed a pattern in terms  
239 of who was more likely to become infected with the virus. Recent reports have shown that,  
240 among confirmed cases, Saudis accounted for 19% of total cases, while other nationalities  
241 accounted for 81%. These results could be attributed to the status of most non-Saudis in terms of  
242 occupation and residence status. A substantial number of foreign workers are in the labour force  
243 and live in heavily crowded areas where they are often unable to observe social distancing  
244 requirements <sup>36</sup>. Previous studies have reported that foreign workers experienced the highest  
245 level of distress among all occupations. Reasons such as worrying about exposure to the virus in  
246 public transportation when commuting to and from work, delays in work time, and job security  
247 and the subsequent loss of their salary may explain the high stress levels <sup>35</sup>. Such results oblige  
248 the government to take and reinforce specific measures to control the increase of infected cases.

249 The American Department of Labor has provided a list of recommendations to reduce the  
250 possibility of worker infection during the pandemic. These include wearing cloth face coverings,  
251 at a minimum, at all times when around co-workers or the general public, frequently washing  
252 your hands with soap and water for at least 20 seconds, avoiding touching your eyes, nose or  
253 mouth with unwashed hands, practicing good respiratory etiquette, including covering coughs  
254 and sneezes or coughing/sneezing into your elbow/upper sleeve, avoiding close contact (within 6  
255 feet for a total of 15 minutes or more over a 24-hour period) with people who are visibly sick and  
256 practicing physical distancing with co-workers and the public, staying home if sick, and  
257 recognizing personal risk factors <sup>37</sup>.

258 Depression and anxiety symptoms were more likely to occur in women than men. Such results  
259 agree with other studies that have investigated depression and anxiety among the Saudi Arabian  
260 population. The results of a study conducted by Al-Khathami et al. (2002) reported that the  
261 prevalence of minor mental illness was significantly higher in women (22.2%) than men (13.7%)  
262 ( $p = 0.0073$ ) <sup>38</sup>. This confirms what has been reported in a previous meta-analysis that explored  
263 the prevalence of depression across 30 countries all over the world between 1994 and 2014. In  
264 this study, women showed higher depression rates compared to men: 14.4% (95% CI: 11.1% to  
265 11.7%) for women and 11.5% (95% CI: 9% to 14.6%) for men <sup>39</sup>.

266 Further, the prevalence rate was higher in the younger age group, which agrees with our study, as  
267 a higher score of depression was associated with individuals younger than 29 years. Further, the  
268 study of Wang et al. (2020) revealed that women were significantly associated with a greater  
269 psychological impact following the COVID-19 outbreak and had higher levels of stress, anxiety  
270 and depression ( $p < 0.05$ )<sup>1</sup>. Several factors could have contributed to the women's higher

271 depression and anxiety prevalence rates, including biological sex differences, culture, diet,  
272 female hormonal fluctuations, or education <sup>40</sup>.

273 Sociodemographic variables associated with depression and anxiety were assessed using logistic  
274 regression analysis. The results showed that individuals over the age of 50 suffered from higher  
275 depressive symptoms, as do those who are single or with lower education levels. Similar findings  
276 were reported by Wang et al. (2020), suggesting an association of lower education with a greater  
277 likelihood of depression during the pandemic. Further, our findings provided data that suggested  
278 the levels of anxiety and depression-related symptoms were greater among students and the  
279 unemployed, or those with a low income. The results agreed with previous research, which also  
280 found that students were more likely to have depression and anxiety <sup>3</sup>. The onset of the pandemic  
281 was in the middle of the academic year, which may have prompted the students' fear of losing  
282 the year or the occurrence of delays in their studies This was in addition to their lack of  
283 confidence in distance learning. The lockdown and social distancing are expected to remain in  
284 place for some time to come, and this will have a direct effect on low-income and unemployed  
285 individuals <sup>41</sup>; this might put such categories under a higher level of stress, which could lead to  
286 symptoms of anxiety and/or depression.

287 The results of this research have emphasised the impact of the COVID-19 pandemic on the  
288 mental health of individuals, expressed in depression and anxiety. Many aspects of the findings  
289 agree with those reported during the pandemic in other countries. Therefore, a worldwide  
290 collaborative effort is required to develop measures that can address mental health during such  
291 pandemics and manage it. The most evidence-based treatment is cognitive behaviour therapy  
292 (CBT), especially Internet CBT as it can prevent the spread of infection during the pandemic.  
293 CBT could be used to treat psychiatric symptoms during the current situation <sup>42</sup>. It provides a

294 cost-effective option that could alleviate negative psychological impacts<sup>43</sup>. A previous meta-  
295 analysis has proved the effectiveness of internet CBT in treating psychiatric symptoms such as  
296 insomnia<sup>44</sup>.

297 This study has demonstrated several strengths. First, it has addressed the prevalence of  
298 depression and anxiety within the initial phase of the pandemic and, hence, may provide valuable  
299 information to policymakers that will enable them to make informed decisions and introduce  
300 psychological interventions that can minimise untoward psychological effects on the mental  
301 health status of the Saudi Arabian population. Second, the study has employed validated tools for  
302 the assessments which have enhanced the reliability of the study. Third, it involved an acceptable  
303 sample size that was not limited to specific geographical areas of Saudi Arabia. However, this  
304 study has several limitations. First, the study was based on a web-based survey method, so some  
305 vulnerable individuals who have no access to the internet and are unfamiliar with online  
306 questionnaires were missed. Second, due to the sudden occurrence of the outbreak, an  
307 individual's anxiety and depression prevalence before the outbreak could not be gauged. Third,  
308 the survey was administered at a single period and so the stability of the responses is unknown.  
309 The study design itself, a cross-sectional survey design, limited our ability to identify causality  
310 between study variables, unlike a recent longitudinal study that was conducted in China which  
311 was able to monitor the change in psychological status among the general population across  
312 different time points of the pandemic<sup>45</sup>. Fourth, the sample may be biased as those who were  
313 more interested in mental health or distressed by the pandemic may have been more likely to  
314 participate. Finally, this study mainly used self-reported questionnaires to measure psychiatric  
315 symptoms and did not make clinical diagnoses. The gold standard for establishing psychiatric  
316 diagnosis involves structured clinical interviews and functional neuroimaging<sup>46,47</sup>.

317 **5. Conclusion**

318 During the initial phase of the COVID-19 pandemic in Saudi Arabia, more than 29% of the  
319 respondents had moderate to severe depression, and 26.6% reported moderate to severe anxiety.  
320 Female gender, student status, low income and low education level respondents were associated  
321 with a greater psychological impact of the outbreak, and higher levels of anxiety and depression.  
322 Our findings may enable policymakers to introduce several measures and psychological  
323 interventions that can enhance mental health during the current pandemic.

324 **Declaration of Competing Interest**

325 The author(s) declared no potential conflicts of interest with respect to the research, authorship and/or  
326 publication of this article.

327

328 **Acknowledgment**

329 This paper appears on a pre-print server (medrxiv):

330 <https://www.medrxiv.org/content/10.1101/2020.05.09.20096677v1>

331 **Data Availability Statement**

332 Data sharing is not applicable to this article as no new data were created or analyzed in this study.

333

334

335

336

337

338

339

340

341

342

343

344

## 345 **References**

- 346 1. Wang C, Pan R, Wan X, et al. Immediate Psychological Responses and Associated Factors during  
347 the Initial Stage of the 2019 Coronavirus Disease (COVID-19) Epidemic among the General  
348 Population in China. *Int J Environ Res Public Health*. 2020;17(5).
- 349 2. Channel News Asia. Novel Coronavirus Map. 2020;  
350 <https://infographics.channelnewsasia.com/covid-19/map.html>. Accessed May 8, 2020.
- 351 3. World Stats. Coronavirus Worldwide Data. 2020; <https://www.world-stat.info/>. Accessed May 8,  
352 2020.
- 353 4. Alyami MH, Naser AY, Orabi MAA, Alwafi H, Alyami HS. Epidemiology of COVID-19 in the  
354 Kingdom of Saudi Arabia: An Ecological Study. *Front Public Health*. 2020;8:506.
- 355 5. World Health Organization. WHO Director-General's opening remarks at the media briefing on  
356 COVID-19. 2020; [https://www.who.int/dg/speeches/detail/who-director-general-s-opening-  
357 remarks-atthe-media-briefing-on-covid-19---11-march-2020](https://www.who.int/dg/speeches/detail/who-director-general-s-opening-remarks-atthe-media-briefing-on-covid-19---11-march-2020). Accessed March 11, 2020.
- 358 6. Barry M, Ghonem L, Alsharidi A, et al. Coronavirus disease-2019 pandemic in the Kingdom of  
359 Saudi Arabia: Mitigation measures and hospital preparedness. *Journal of Nature and Science of  
360 Medicine*. 2020;0(0).
- 361 7. Worldometers. COVID-19 Coronavirus Pandemic. 2021;  
362 <https://www.worldometers.info/coronavirus/>. Accessed April 06, 2021.
- 363 8. Reuters. Saudi Arabia temporarily suspends entry of GCC citizens to Mecca and Medina: foreign  
364 ministry. 2020; <https://www.reuters.com/article/us-health-china-saudi-idUSKCN20M31T>.  
365 Accessed February 28, 2020.
- 366 9. Al Arabia News. Coronavirus: Saudi Arabia imposes 24-hour curfew in several cities, including  
367 Riyadh. 2020; [https://english.alarabiya.net/en/News/gulf/2020/04/06/Coronavirus-Saudi-  
368 Arabia-imposes-24-hour-curfew-in-several-cities-including-Riyadh](https://english.alarabiya.net/en/News/gulf/2020/04/06/Coronavirus-Saudi-Arabia-imposes-24-hour-curfew-in-several-cities-including-Riyadh). Accessed April 6, 2020.
- 369 10. Cao W, Fang Z, Hou G, et al. The psychological impact of the COVID-19 epidemic on college  
370 students in China. *Psychiatry Res*. 2020;287:112934.
- 371 11. Chen Q, Liang M, Li Y, et al. Mental health care for medical staff in China during the COVID-19  
372 outbreak. *The Lancet Psychiatry*. 2020;7(4):e15-e16.
- 373 12. Downes E. Nursing and complex humanitarian emergencies: Ebola is more than a disease. *Nurs  
374 Outlook*. 2015;63(1):12-15.
- 375 13. Huang Y, Zhao N. Generalized anxiety disorder, depressive symptoms and sleep quality during  
376 COVID-19 outbreak in China: a web-based cross-sectional survey. *Psychiatry Res*.  
377 2020;288:112954.
- 378 14. Zhai Y, Du X. Mental health care for international Chinese students affected by the COVID-19  
379 outbreak. *The Lancet Psychiatry*. 2020;7(4).
- 380 15. Aljunmeeyn A, El-Dahiyat F, Altakhineh MM, Azab M, Babar Z-U-D. Understanding the factors  
381 influencing healthcare providers' burnout during the outbreak of COVID-19 in Jordanian  
382 hospitals. *Journal of Pharmaceutical Policy and Practice*. 2020;13(1).



- 383 16. Alsairafi Z, Naser AY, Alsaleh FM, Awad A, Jalal Z. Mental Health Status of Healthcare  
384 Professionals and Students of Health Sciences Faculties in Kuwait during the COVID-19  
385 Pandemic. *Int J Environ Res Public Health*. 2021;18(4).
- 386 17. Naser AY, Al-Hadithi HT, Dahmash EZ, Alwafi H, Alwan SS, Abdullah ZA. The effect of the 2019  
387 coronavirus disease outbreak on social relationships: A cross-sectional study in Jordan. *Int J Soc*  
388 *Psychiatry*. 2020:20764020966631.
- 389 18. Naser AY, Dahmash EZ, Al-Rousan R, et al. Mental health status of the general population,  
390 healthcare professionals, and university students during 2019 coronavirus disease outbreak in  
391 Jordan: A cross-sectional study. *Brain Behav*. 2020;10(8):e01730.
- 392 19. Le HT, Lai AJX, Sun J, et al. Anxiety and Depression Among People Under the Nationwide Partial  
393 Lockdown in Vietnam. *Front Public Health*. 2020;8:589359.
- 394 20. Tee ML, Tee CA, Anlacan JP, et al. Psychological impact of COVID-19 pandemic in the Philippines.  
395 *J Affect Disord*. 2020;277:379-391.
- 396 21. Xiong J, Lipsitz O, Nasri F, et al. Impact of COVID-19 pandemic on mental health in the general  
397 population: A systematic review. *J Affect Disord*. 2020;277:55-64.
- 398 22. Levis B, Benedetti A, Thombs BD, Collaboration DESD. Accuracy of Patient Health Questionnaire-  
399 9 (PHQ-9) for screening to detect major depression: individual participant data meta-analysis.  
400 *BMJ*. 2019;365:l1476.
- 401 23. Martin A, Rief W, Klaiberg A, Braehler E. Validity of the Brief Patient Health Questionnaire Mood  
402 Scale (PHQ-9) in the general population. *Gen Hosp Psychiatry*. 2006;28(1):71-77.
- 403 24. Maurer DM RT, Davis BN. . Depression: Screening and diagnosis. . *American family physician*.  
404 2018;98(8):508 - 515.
- 405 25. Yoon S, Lee Y, Han C, et al. Usefulness of the Patient Health Questionnaire-9 for Korean medical  
406 students. *Acad Psychiatry*. 2014;38(6):661-667.
- 407 26. Löwe B DO, Müller S, Brähler E, Schellberg D, Herzog W, Herzberg PY. . Validation and  
408 standardization of the Generalized Anxiety Disorder Screener (GAD-7) in the general population.  
409 . *Medical care* 2008;46(3):266-274.
- 410 27. Hinz A, Mehnert A, Kocalevent RD, et al. Assessment of depression severity with the PHQ-9 in  
411 cancer patients and in the general population. *BMC Psychiatry*. 2016;16:22.
- 412 28. Hartung TJ, Friedrich M, Johansen C, et al. The Hospital Anxiety and Depression Scale (HADS)  
413 and the 9-item Patient Health Questionnaire (PHQ-9) as screening instruments for depression in  
414 patients with cancer. *Cancer*. 2017;123(21):4236-4243.
- 415 29. Esser P, Hartung TJ, Friedrich M, et al. The Generalized Anxiety Disorder Screener (GAD-7) and  
416 the anxiety module of the Hospital and Depression Scale (HADS-A) as screening tools for  
417 generalized anxiety disorder among cancer patients. *Psychooncology*. 2018;27(6):1509-1516.
- 418 30. Schwenk T, Terrell, L., Harrison, R., Tremper, A., Valenstein, M., & Bostwick, J. . *UMHS*  
419 *Depression Guideline*. 2011.
- 420 31. Spitzer R, Kroenke K, Williams J, Löwe B. A brief measure for assessing generalized anxiety  
421 disorder: the GAD-7. . *Archives of internal medicine*. 2006;166(10):1092 - 1097.
- 422 32. World Health Organization. Sample size determination in health studies: a practical manual. .  
423 1991.
- 424 33. Centre for Disease Control and Prevention. Center of Disease Control- Coronavirus Disease 2019,  
425 Stress and Coping. 2020; [https://www.cdc.gov/coronavirus/2019-ncov/daily-life-](https://www.cdc.gov/coronavirus/2019-ncov/daily-life-coping/managing-stress-anxiety.html)  
426 [coping/managing-stress-anxiety.html](https://www.cdc.gov/coronavirus/2019-ncov/daily-life-coping/managing-stress-anxiety.html) Accessed May 04, 2020.
- 427 34. Zandifar A, Badrfam R. Iranian mental health during the COVID-19 epidemic. *Asian J Psychiatr*.  
428 2020;51:101990.

- 429 35. Qiu J, Shen B, Zhao M, Wang Z, Xie B, Xu Y. A nationwide survey of psychological distress among  
430 Chinese people in the COVID-19 epidemic: implications and policy recommendations. *Gen*  
431 *Psychiatr.* 2020;33(2):e100213.
- 432 36. Ministry of Health. Ministry of Health Saudi Arabia, Daily Report. 2020;  
433 [https://www.facebook.com/SaudiMOH/photos/rpp.142409672494890/3097837363618758/?ty](https://www.facebook.com/SaudiMOH/photos/rpp.142409672494890/3097837363618758/?type=3&theater)  
434 [pe=3&theater](https://www.facebook.com/SaudiMOH/photos/rpp.142409672494890/3097837363618758/?type=3&theater). Accessed May 04, 2020.
- 435 37. United States Department of Labor. Occupational Safety and Health Administration: COVID-19  
436 Control and Prevention. 2020; <https://www.osha.gov/coronavirus/control-prevention>. Accessed  
437 March 30, 2021.
- 438 38. Al-Khathami A, Ogbeide D. Prevalence of mental illness among Saudi adult primary-care patients  
439 in Central Saudi Arabia. *Saudi Med J.* 2002;23(6):721 - 724.
- 440 39. Lim GY, Tam WW, Lu Y, Ho CS, Zhang MW, Ho RC. Prevalence of Depression in the Community  
441 from 30 Countries between 1994 and 2014. *Sci Rep.* 2018;8(1):2861.
- 442 40. Albert PR. Why is depression more prevalent in women? *J Psychiatry Neurosci.* 2015;40(4):219-  
443 221.
- 444 41. Atkeson A. *What will be the economic impact of COVID-19 in the US? Rough estimates of disease*  
445 *scenarios.* . National Bureau of Economic Research;2020.
- 446 42. Ho C, Chee C, Ho R. Mental Health Strategies to Combat the Psychological Impact of COVID-19  
447 Beyond Paranoia and Panic. *Ann Acad Med Singap.* 2020;49(3):155-160.
- 448 43. Zhang M, Ho R. Moodle: The cost effective solution for internet cognitive behavioral therapy (I-  
449 CBT) interventions. *Technol Health Care.* 2017;25(1):163-165.
- 450 44. Soh H, Ho R, Ho C, Tam W. Efficacy of digital cognitive behavioural therapy for insomnia: a meta-  
451 analysis of randomised controlled trials. *Sleep Med.* 2020;75:315-325.
- 452 45. Wang C, Pan R, Wan X, et al. A longitudinal study on the mental health of general population  
453 during the COVID-19 epidemic in China. *Brain Behav Immun.* 2020;87:40-48.
- 454 46. Ho CSH, Lim LJH, Lim AQ, et al. Diagnostic and Predictive Applications of Functional Near-  
455 Infrared Spectroscopy for Major Depressive Disorder: A Systematic Review. *Front Psychiatry.*  
456 2020;11:378.
- 457 47. Husain SF, Yu R, Tang TB, et al. Validating a functional near-infrared spectroscopy diagnostic  
458 paradigm for Major Depressive Disorder. *Sci Rep.* 2020;10(1):9740.

459

460

461

462

463

464

465

466

467

468

469

470 **Tables:**

471 **Table 1** Participants baseline characteristics

| <b>Demographics</b>                                                                                    | <b>N. (%)</b> |
|--------------------------------------------------------------------------------------------------------|---------------|
| <b>Nationality No. (%)</b>                                                                             |               |
| Saudi                                                                                                  | 1,765 (84.8)  |
| <b>Gender No. (%)</b>                                                                                  |               |
| Male                                                                                                   | 1,404 (67.5)  |
| <b>Age No. (%)</b>                                                                                     |               |
| 18 – 29 years                                                                                          | 757 (36.4)    |
| 30 – 49 years                                                                                          | 1,140 (54.8)  |
| 50 years and above                                                                                     | 184 (8.8)     |
| <b>Marital Status No. (%)</b>                                                                          |               |
| Single                                                                                                 | 652 (31.3)    |
| Married                                                                                                | 1,298 (62.4)  |
| Divorced                                                                                               | 131 (6.3)     |
| <b>Education level No. (%)</b>                                                                         |               |
| Completed secondary grade                                                                              | 488 (23.5)    |
| Complete bachelor degree                                                                               | 1,284 (61.7)  |
| Higher education                                                                                       | 309 (14.8)    |
| <b>Employment status No. (%)</b>                                                                       |               |
| Retired                                                                                                | 79 (3.8)      |
| Unemployed                                                                                             | 455 (21.9)    |
| Employed                                                                                               | 1,272 (61.1)  |
| University students                                                                                    | 275 (13.2)    |
| <b>Income No. (%)</b>                                                                                  |               |
| 2000 SR or below                                                                                       | 585 (28.1)    |
| 2000 – 5000 SR                                                                                         | 273 (13.1)    |
| 5000 – 10,000 SR                                                                                       | 614 (29.5)    |
| 10,000 SR and above                                                                                    | 609 (29.3)    |
| <b>Chronic disease history No. (%)</b>                                                                 |               |
| Yes                                                                                                    | 255 (12.3)    |
| <b>Worried about being infected with the corona virus or transmitting it to family members No. (%)</b> |               |
| Yes                                                                                                    | 1,587 (76.3)  |

472 No: Number, SR: Saudi Riyal

473

474

475 **Table 2** Prevalence of depression and anxiety among the participants stratified by severity

|                                     | N. (%)       |
|-------------------------------------|--------------|
| <b>Depression diagnose</b>          |              |
| <b>Minimal depression</b>           | 617 (29.6)   |
| <b>Mild depression</b>              | 852 (40.9)   |
| <b>Moderate depression</b>          | 416 (20.0)   |
| <b>Moderately severe depression</b> | 129 (6.2)    |
| <b>Severe depression</b>            | 67 (3.2)     |
| <b>Anxiety diagnose</b>             |              |
| <b>Mild anxiety</b>                 | 1,529 (73.5) |
| <b>Moderate anxiety</b>             | 401 (19.3)   |
| <b>Severe anxiety</b>               | 151(7.3)     |

476

477 **Table 3** Prevalence of depression and anxiety among the participants stratified by severity and gender

|                                     | N. (%)       |            |
|-------------------------------------|--------------|------------|
| <b>Depression diagnose</b>          |              |            |
|                                     | Males        | Females    |
| <b>Minimal depression</b>           | 455 (32.4)   | 162 (23.9) |
| <b>Mild depression</b>              | 565 (40.2)   | 287 (42.4) |
| <b>Moderate depression</b>          | 270 (19.2)   | 146 (21.6) |
| <b>Moderately severe depression</b> | 75 (5.3)     | 54 (8.0)   |
| <b>Severe depression</b>            | 39 (2.8)     | 28 (4.1)   |
| <b>Anxiety diagnose</b>             |              |            |
|                                     | Males        | Females    |
| <b>Mild anxiety</b>                 | 1,072 (76.4) | 457(67.5)  |
| <b>Moderate anxiety</b>             | 259 (18.4)   | 142 (21.0) |
| <b>Severe anxiety</b>               | 79 (5.6)     | 72 (10.6)  |

478

479

480

481

482 **Table 4** Depression and anxiety median score stratified by participants' characteristics

| Variable                  | Depression score |      |          | Anxiety score |      |          |
|---------------------------|------------------|------|----------|---------------|------|----------|
|                           | Median           | IQR  | P-value  | Median        | IQR  | P-value  |
| <b>Nationality</b>        |                  |      |          |               |      |          |
| Saudi                     | 7.00             | 6.00 | 0.000*** | 6.00          | 5.00 | 0.000*** |
| Non-Saudi                 | 9.00             | 7.00 |          | 7.00          | 5.00 |          |
| <b>Gender</b>             |                  |      |          |               |      |          |
| Males                     | 7.00             | 7.00 | 0.000*** | 5.00          | 5.00 | 0.000*** |
| Females                   | 8.00             | 6.00 |          | 6.00          | 5.00 |          |
| <b>Age</b>                |                  |      |          |               |      |          |
| 18 –29 years              | 8.00             | 7.00 | 0.001**  | 5.00          | 6.00 | 0.659    |
| 30 – 49 years             | 7.00             | 6.00 |          | 6.00          | 4.00 |          |
| 50 years and above        | 8.00             | 8.00 |          | 6.00          | 4.00 |          |
| <b>Marital status</b>     |                  |      |          |               |      |          |
| Single                    | 8.00             | 8.00 | 0.000*** | 5.00          | 6.00 | 0.228    |
| Married                   | 7.00             | 5.00 |          | 6.00          | 5.00 |          |
| Divorced                  | 8.00             | 6.00 |          | 6.00          | 4.00 |          |
| <b>Education level</b>    |                  |      |          |               |      |          |
| Completed secondary grade | 8.00             | 8.00 | 0.005**  | 6.00          | 7.00 | 0.012*   |
| Complete bachelor degree  | 7.00             | 6.00 |          | 6.00          | 5.00 |          |
| Higher education          | 7.00             | 6.00 |          | 6.00          | 4.00 |          |
| <b>Employment status</b>  |                  |      |          |               |      |          |
| Retired                   | 7.00             | 8.00 | 0.000*** | 6.00          | 6.00 | 0.188    |
| Unemployed                | 7.00             | 7.00 |          | 6.00          | 5.00 |          |
| Employed                  | 7.00             | 6.00 |          | 6.00          | 5.00 |          |
| University students       | 8.00             | 8.00 |          | 5.00          | 5.00 |          |
| <b>Income</b>             |                  |      |          |               |      |          |
| 2000 SR or below          | 8.00             | 8.00 | 0.000*** | 6.00          | 6.00 | 0.701    |
| 2000 – 5000 SR            | 7.00             | 7.00 |          | 6.00          | 4.00 |          |
| 5000 – 10,000 SR          | 7.00             | 6.00 |          | 6.00          | 4.00 |          |
| 10,000 SR and above       | 6.00             | 6.00 |          | 6.00          | 5.00 |          |

483 \*p < 0.05; \*\*p < 0.01; \*\*\*p < 0.001; Abbreviation: IQR, Interquartile Range

484 **Table 5** Logistic regression analysis

| Variable                                 | Odds ratio (95%CI) for depression | Odds ratio (95%CI) for anxiety |
|------------------------------------------|-----------------------------------|--------------------------------|
| <b>Nationality</b>                       |                                   |                                |
| Non-Saudi (Reference)                    | 1.00                              | 1.00                           |
| Saudi                                    | 0.67 (0.46 – 0.97)*               | 1.15 (0.65 – 2.04)             |
| <b>Gender</b>                            |                                   |                                |
| Female (Reference)                       | 1.00                              | 1.00                           |
| Male                                     | 0.64 (0.48 – 0.87)**              | 0.48 (0.31 – 0.72)***          |
| <b>Age</b>                               |                                   |                                |
| Less than 50 years (Reference)           | 1.00                              | 1.00                           |
| 50 years and above                       | 0.78 (0.44 – 1.37)                | 0.28 (0.09 – 0.90)*            |
| <b>Marital status</b>                    |                                   |                                |
| Single (Reference)                       | 1.00                              | 1.00                           |
| Married                                  | 0.44 (0.33 – 0.60)***             | 0.69 (0.45 – 1.04)             |
| Divorced                                 | 0.78 (0.40 – 1.52)                | 0.24 (0.06 – 0.99)*            |
| <b>Education level</b>                   |                                   |                                |
| Completed secondary grade<br>(Reference) | 1.00                              | 1.00                           |
| Complete bachelor degree                 | 0.69 (0.51 – 0.93)*               | 0.75 (0.49 – 1.14)             |
| Higher education                         | 0.70 (0.44 – 1.12)                | 0.63 (0.32 – 1.23)             |
| <b>Employment status</b>                 |                                   |                                |
| Employed (Reference)                     | 1.00                              | 1.00                           |
| Unemployed                               | 1.71 (1.24 – 2.36)**              | 2.01 (1.35 – 3.27)**           |
| Retired                                  | 0.64 (0.26 – 1.60)                | 0.49 (0.12 – 2.05)             |
| University students                      | 2.22 (1.55 – 3.17)***             | 1.80 (1.06 – 3.06)*            |
| <b>Income</b>                            |                                   |                                |
| 2000 SR or below (Reference)             | 1.00                              | 1.00                           |
| 2000 – 5000 SR                           | 1.22 (0.81 – 1.84)                | 1.16 (0.64 – 2.09)             |
| 5000 – 10,000 SR                         | 0.51 (0.35 – 0.74)***             | 0.47 (0.28 – 0.81)**           |
| 10,000 SR and above                      | 0.48 (0.033 – 0.70)***            | 0.70 (0.43 – 1.15)             |

485 \*p < 0.05; \*\*p < 0.01; \*\*\*p < 0.001

486

487
